# Supplementary material for: Deposition of Pd nanoparticles on 2D Ni–Fe-MOF ultrathin nanosheets for efficient N-alkylation of amines by alcohols under visible light
Source: Royal Society of Chemistry journal article supplement (doi:10.1039/d3ta04617f), 2023-01-01
Supplement: d3ta04617f1.pdf [file d3ta04617f1.pdf]

## Supporting Information

### **Deposition of Pd Nanoparticles on 2D Ni-Fe-MOF Ultrathin Nanosheets for Efficient N-Alkylation of Amines by Alcohols under Visible Light**

*Yun Yuan, Jiaqi Wang, Hurunqing Liu, Zhaohui Li\**

Research Institute of Photocatalysis, State Key Laboratory of Photocatalysis on Energy and Environment, College of Chemistry, Fuzhou University, Fuzhou 350116, P. R. China

\* E-mail: [zhaohuili@fzu.edu.cn](mailto:zhaohuili@fzu.edu.cn)

---

\* Author to whom all correspondences should be addressed.

E-mail: [zhaohuili@fzu.edu.cn](mailto:zhaohuili@fzu.edu.cn)

Figure S1. GC graphs of standard materials and the product after the reaction (a) aniline (b) benzaldehyde; (c) N-benzylideneaniline; (d) N-benzylaniline; (e) filtrate obtained after 12h of reaction over 2 wt% Pd/Ni-Fe-MOF NSs.

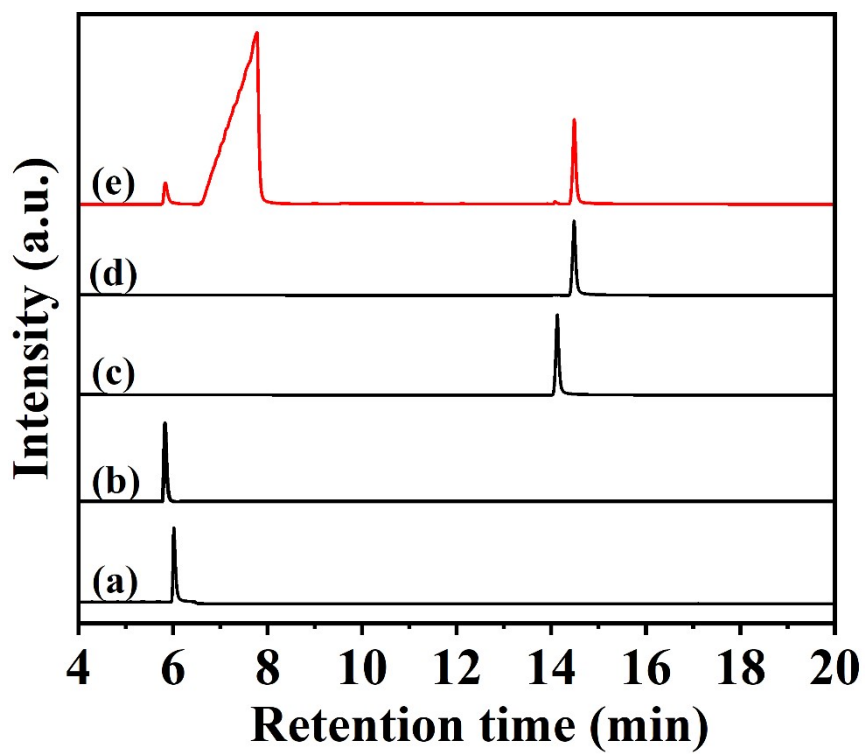

Figure S2. Mass spectrum of the product from aniline with benzyl alcohol.

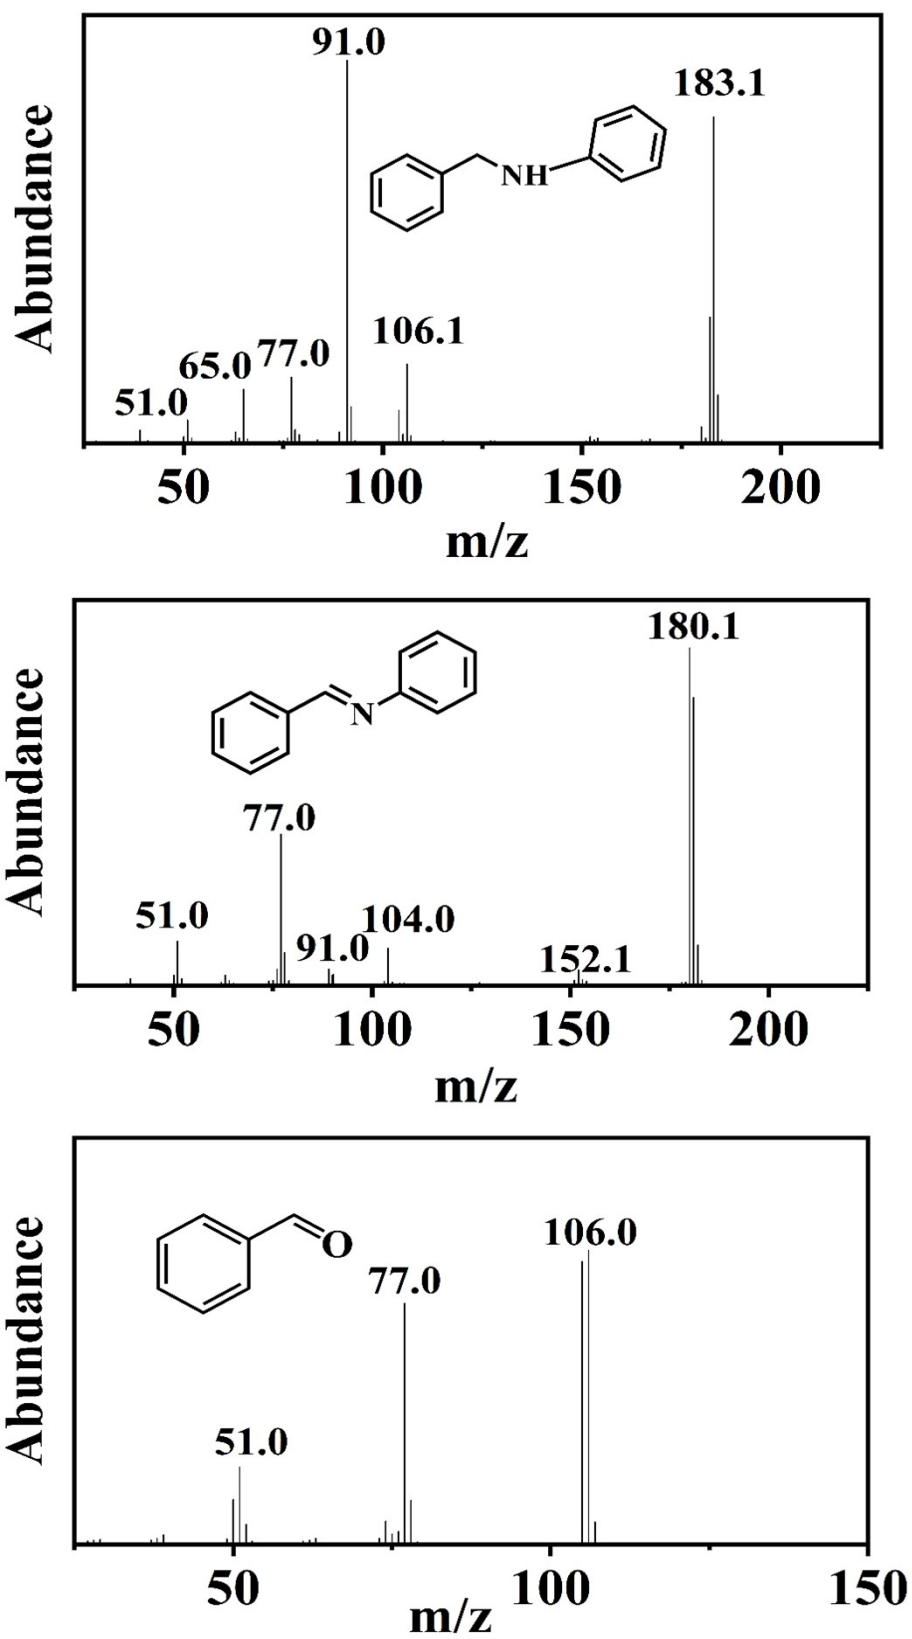

Figure S3. Mass spectrum of the product from *p*-methoxyaniline with benzyl alcohol.

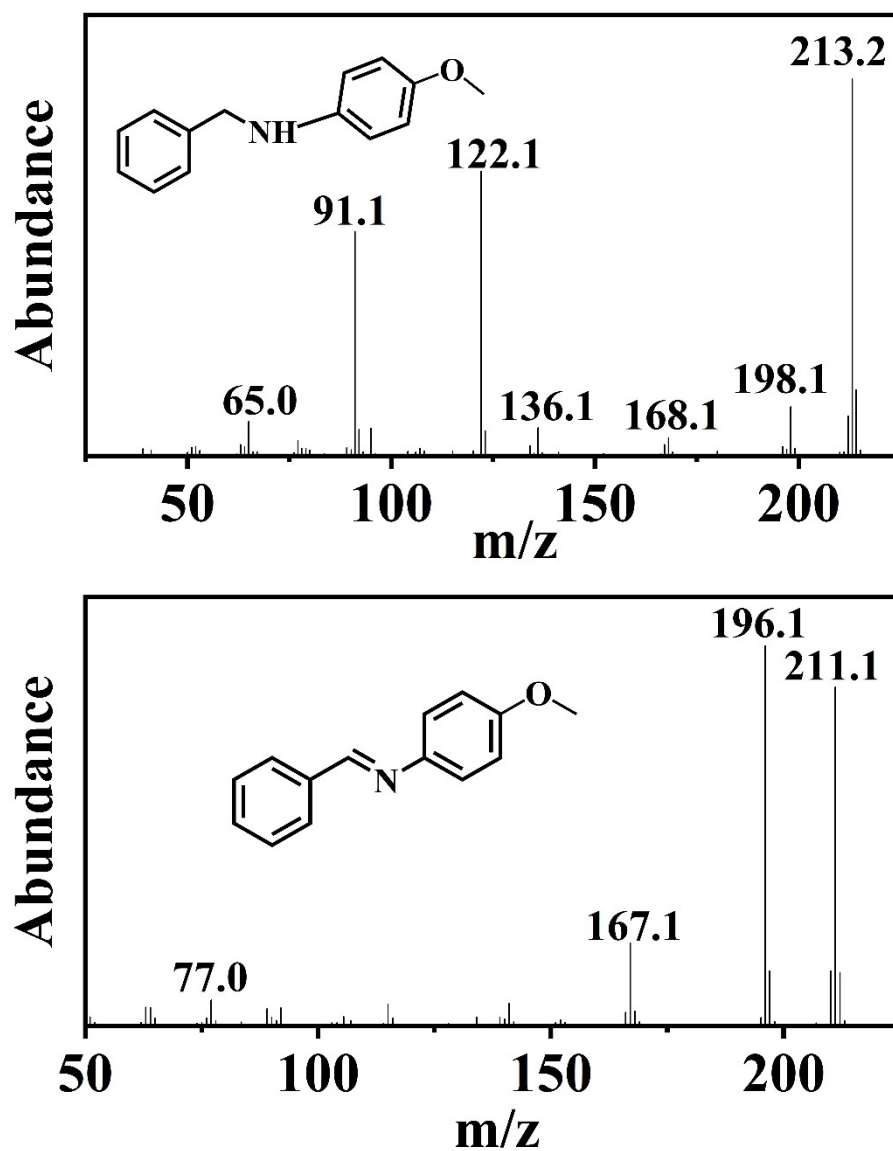

Figure S4. Mass spectrum of the product from *p*-tolidine with benzyl alcohol.

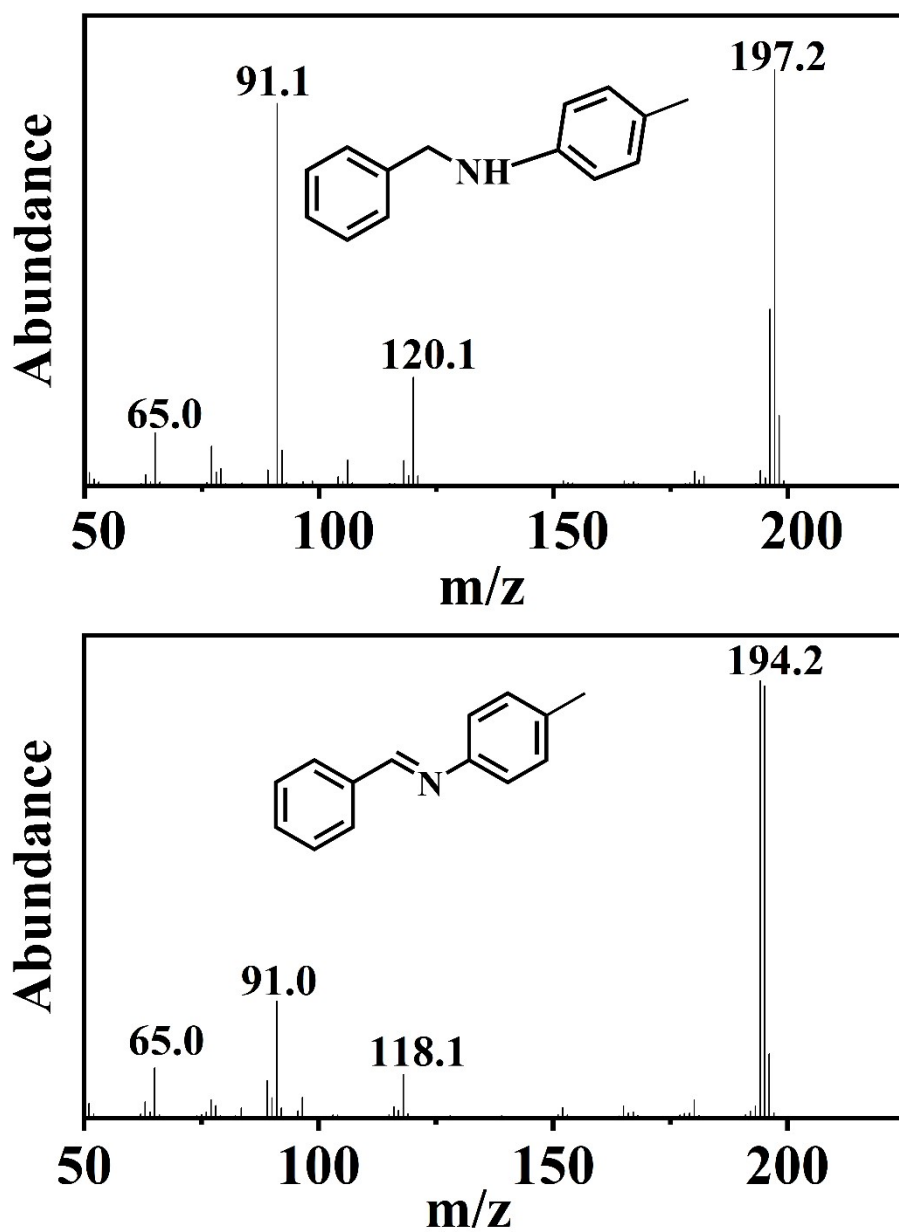

Figure S5. Mass spectrum of the product from *p*-chloroaniline with benzyl alcohol.

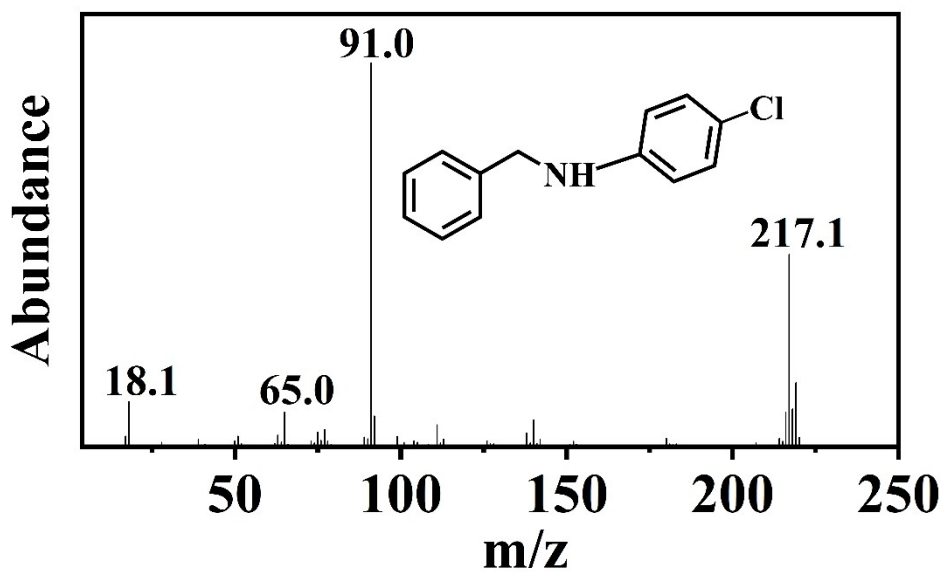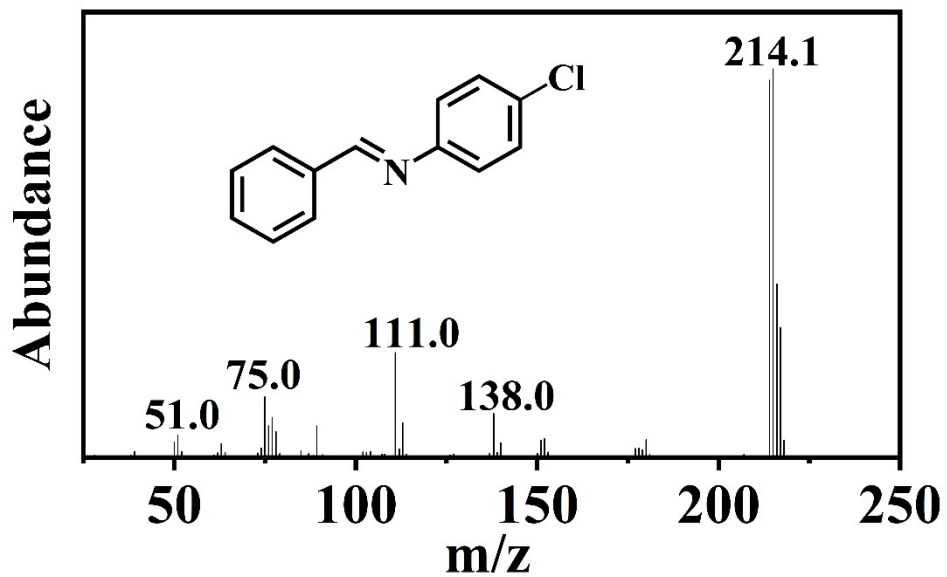

Figure S6. Mass spectrum of the product from aniline with *p*-methoxybenzyl alcohol.

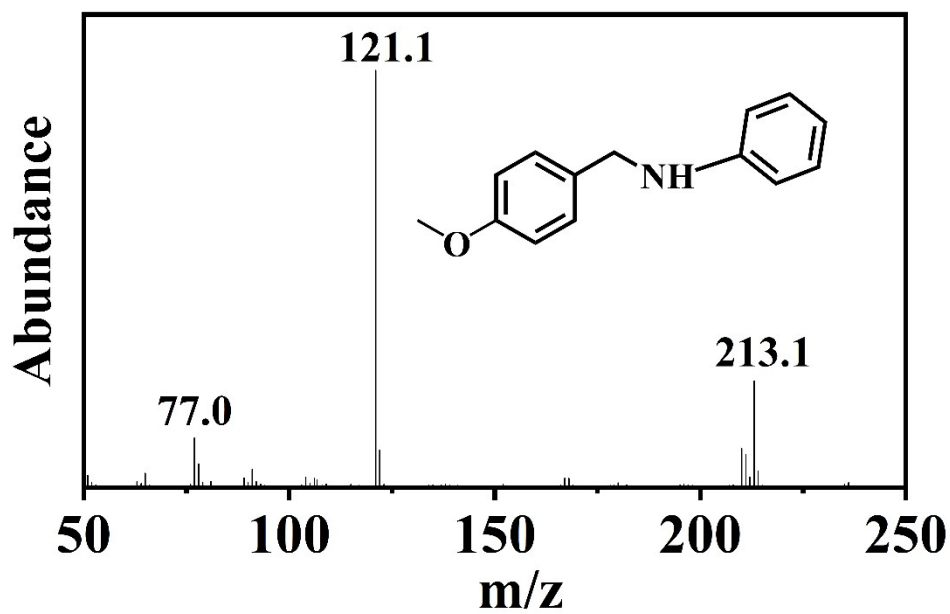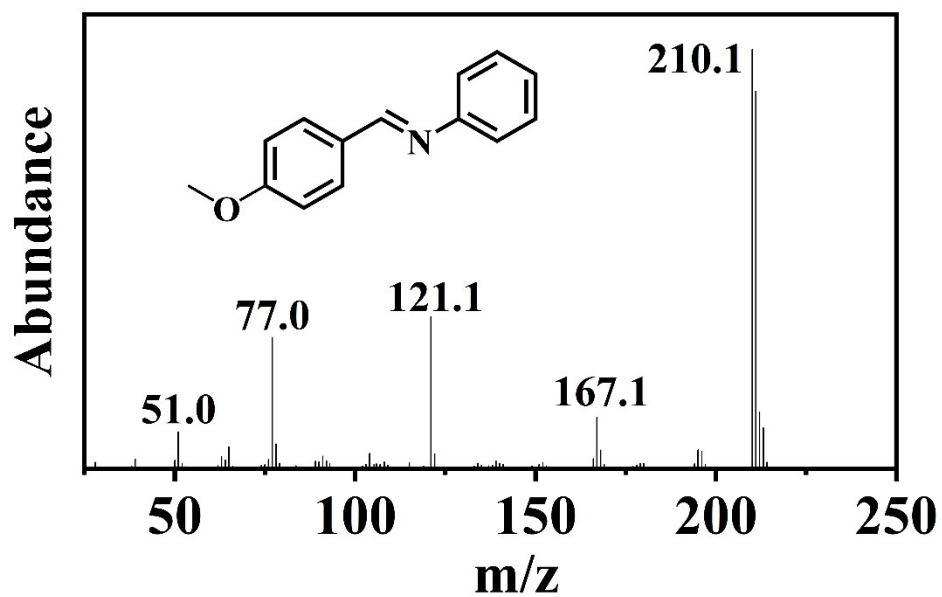

Figure S7. Mass spectrum of the product from aniline with *p*-methylbenzyl alcohol.

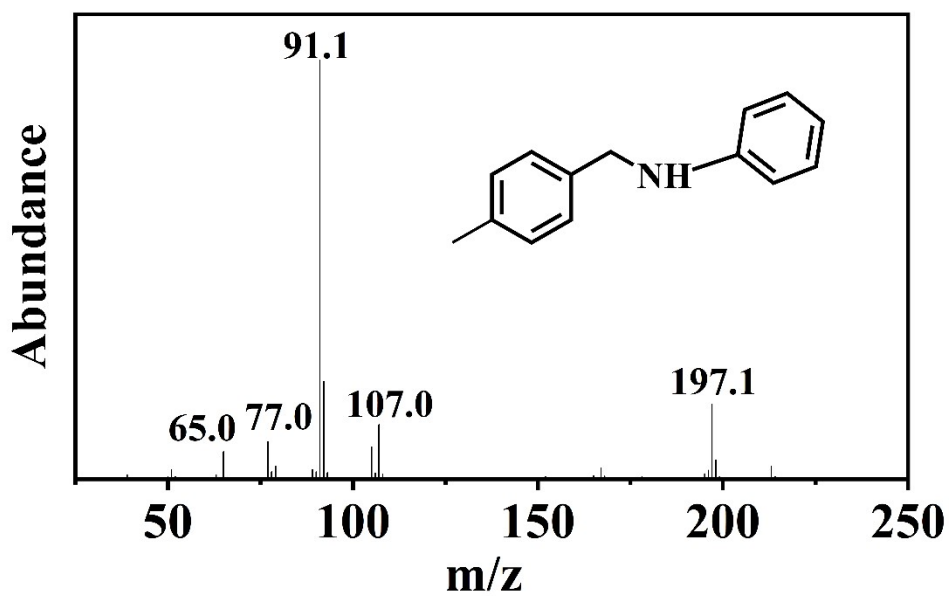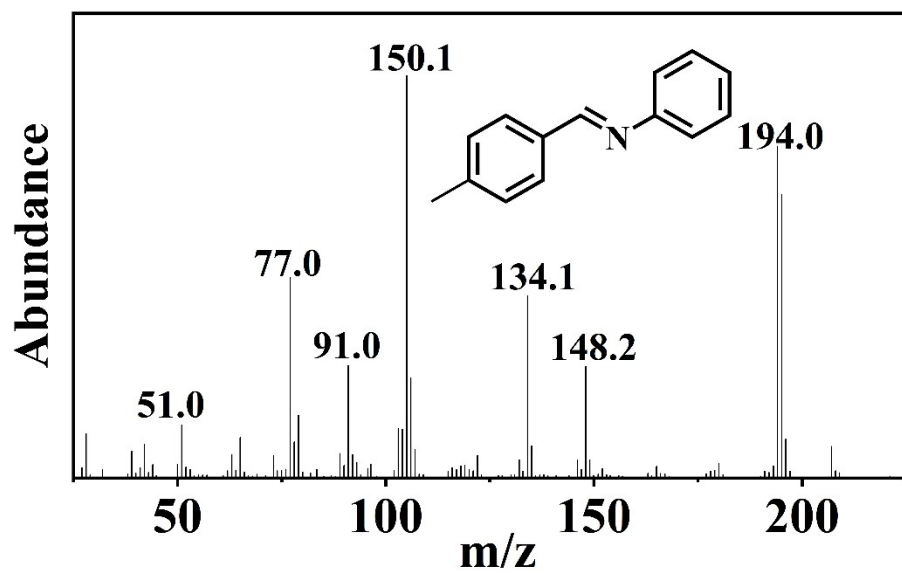



Figure S8. Mass spectrum of the product from aniline with *m*-methylbenzyl alcohol.

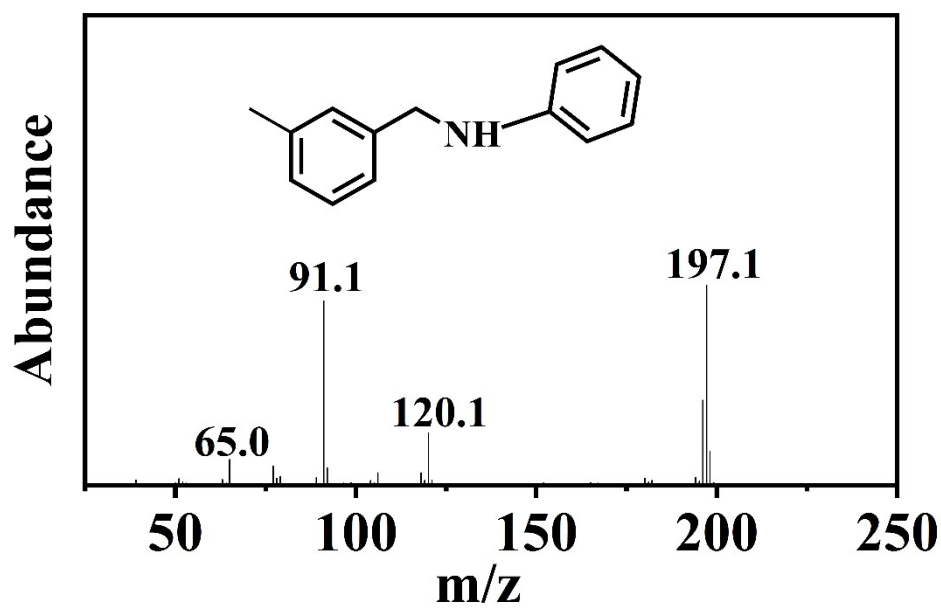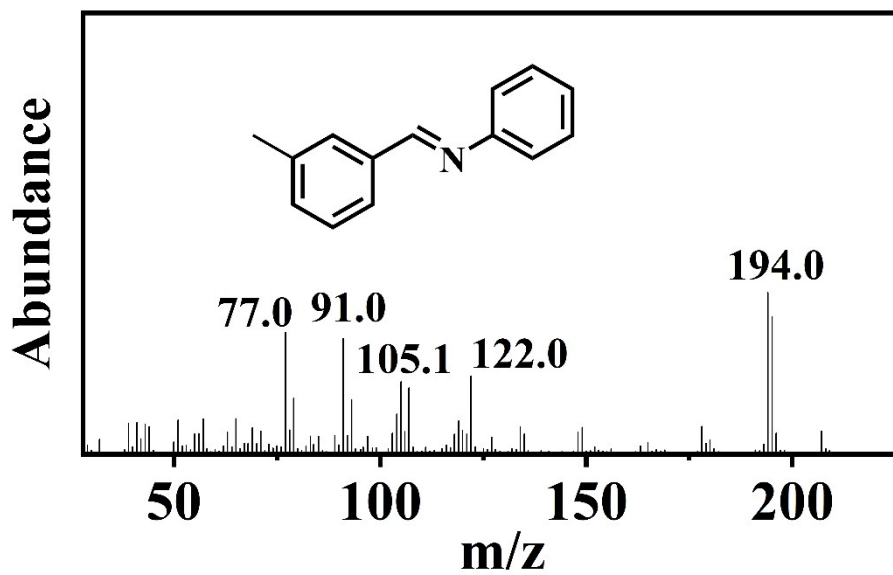

Figure S9. Mass spectrum of the product from aniline with *o*-methylbenzyl alcohol.

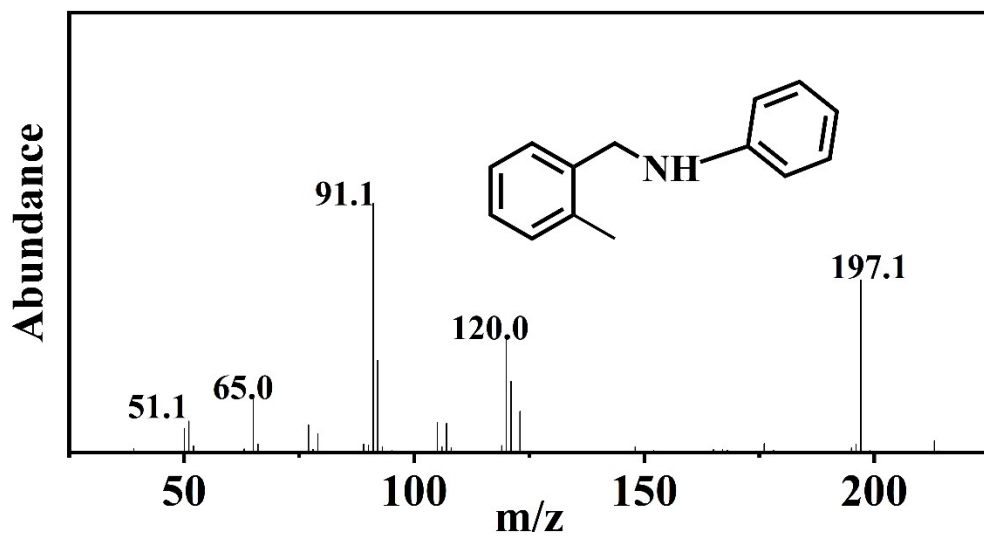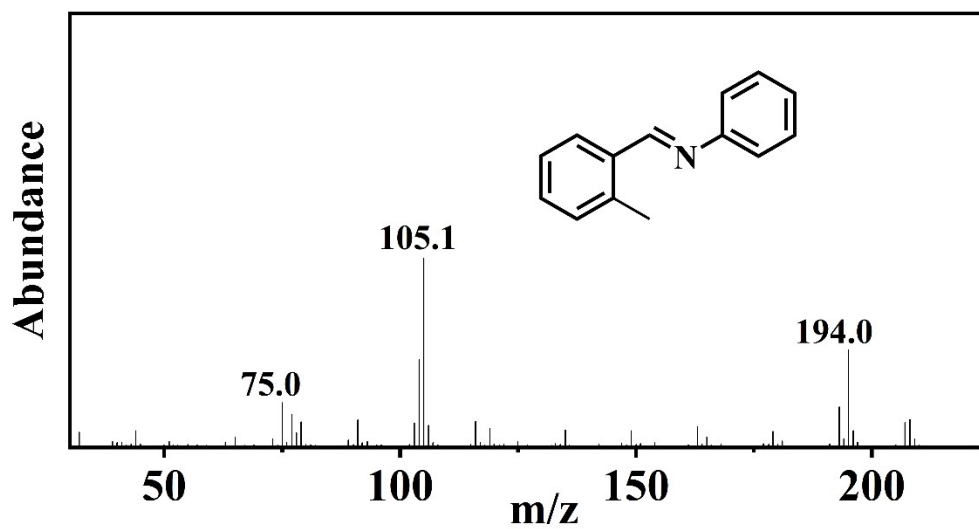

Figure S10. XPS spectra of Ni-Fe-MOF NSs (a) Fe 2p, (b) Ni 2p, and (c) S 2p.

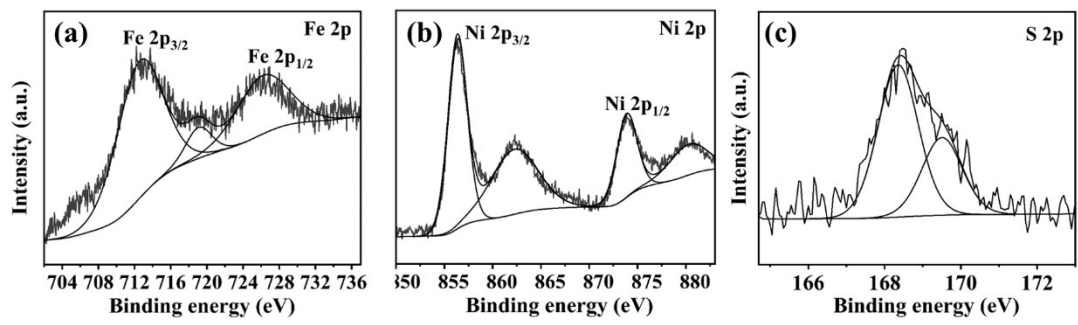

Figure S11. FT-IR spectra of prepared Ni-Fe-MOF NSs.

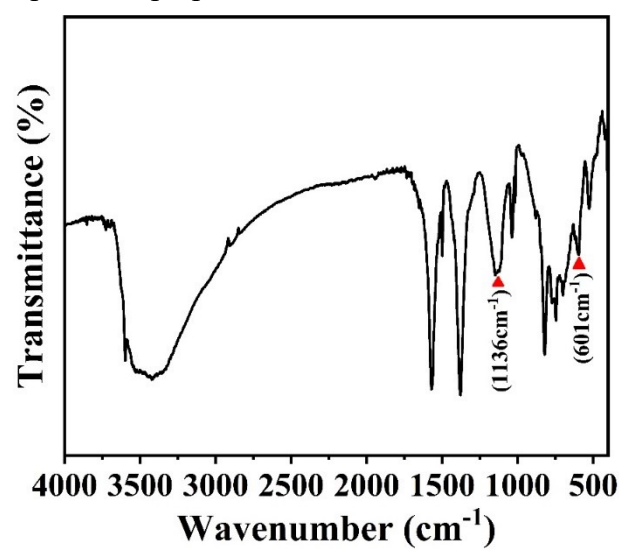

Figure S12. Mott-Schottky plots of Ni-Fe-MOF NSs.

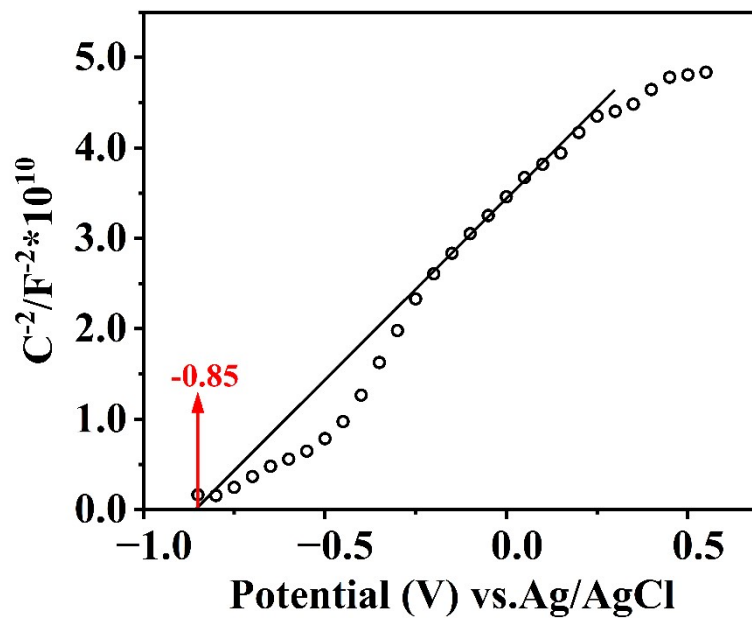

Figure S13. XRD patterns of (a)  $x$  wt% Pt/Ni-Fe-MOF NSs ( $x = 1, 2, 4$ ), (b)  $x$  wt% Au/Ni-Fe-MOF NSs ( $x = 1, 2, 4$ ), (c)  $x$  wt% Ag/Ni-Fe-MOF NSs ( $x = 1, 2, 4$ ).

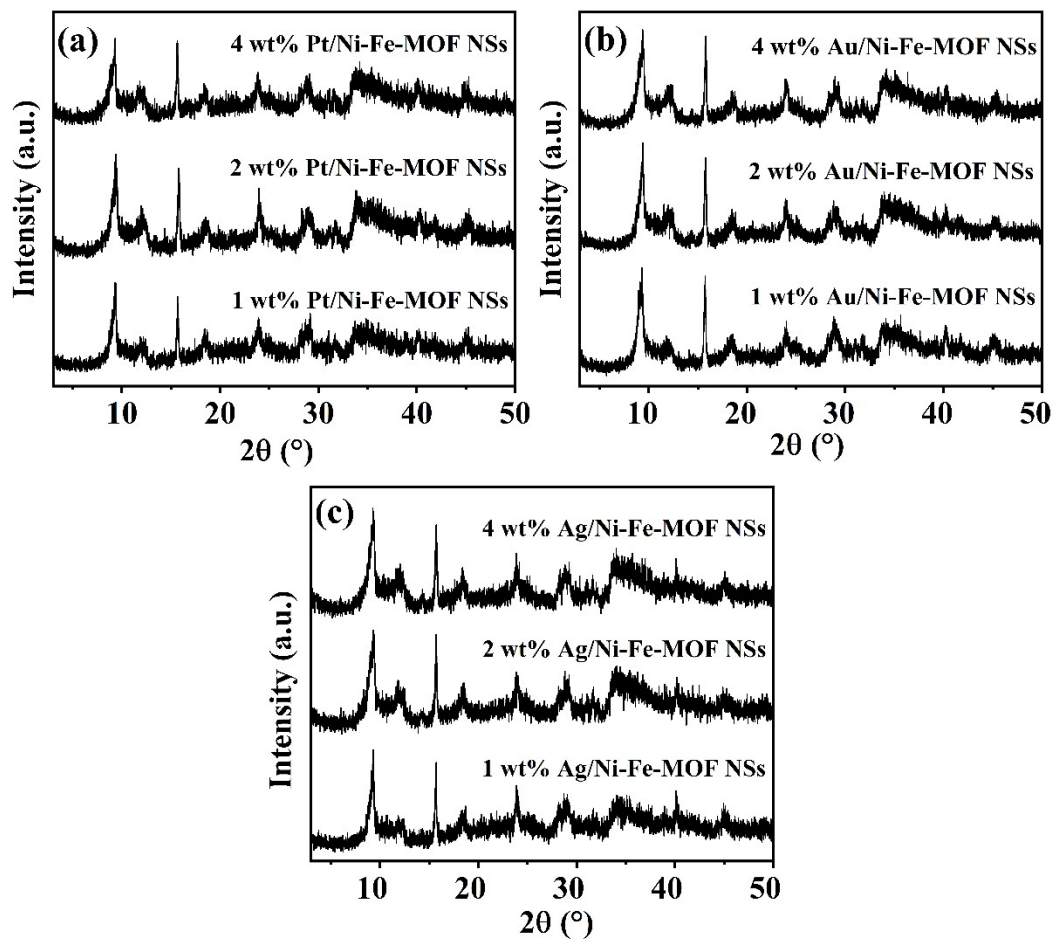

Figure S14. XRD patterns of 2 wt% Pd/bulk Ni-Fe-MOF.

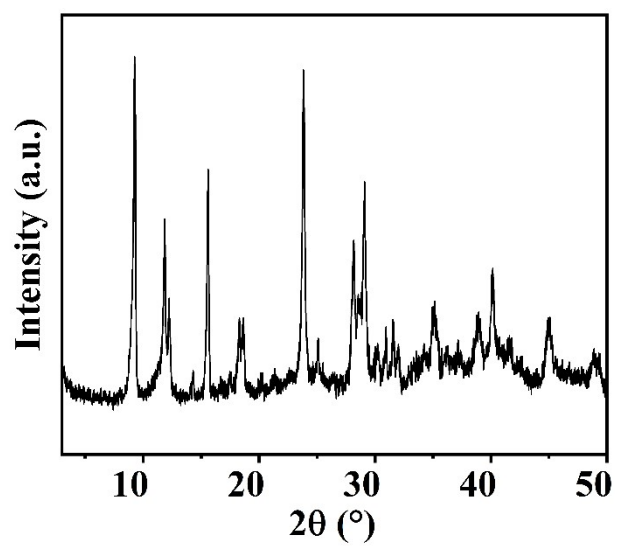

Figure S15. SEM images of 2 wt% Pd/bulk Ni-Fe-MOF.

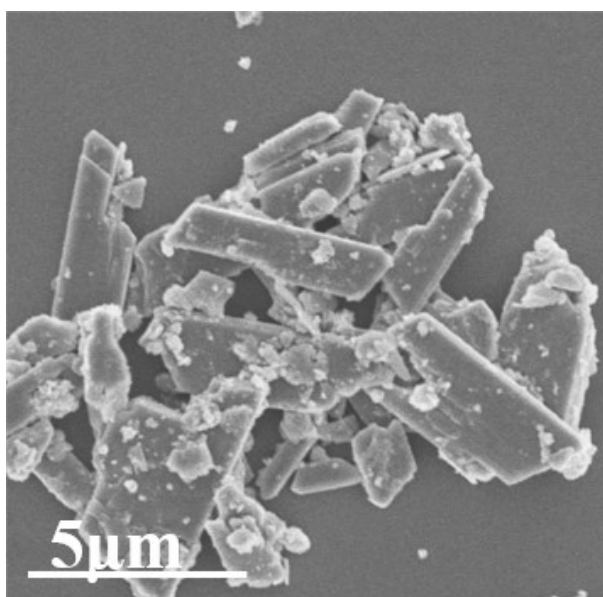



Figure S16. (a) Photoluminescence (PL) spectroscopy 2 wt% Pd/Ni-Fe-MOF NSs and 2 wt% Pd/bulk Ni-Fe-MOF, (b) Fluorescent lifetimes spectroscopy 2 wt% Pd/Ni-Fe-MOF NSs and 2 wt% Pd/bulk Ni-Fe-MOF.

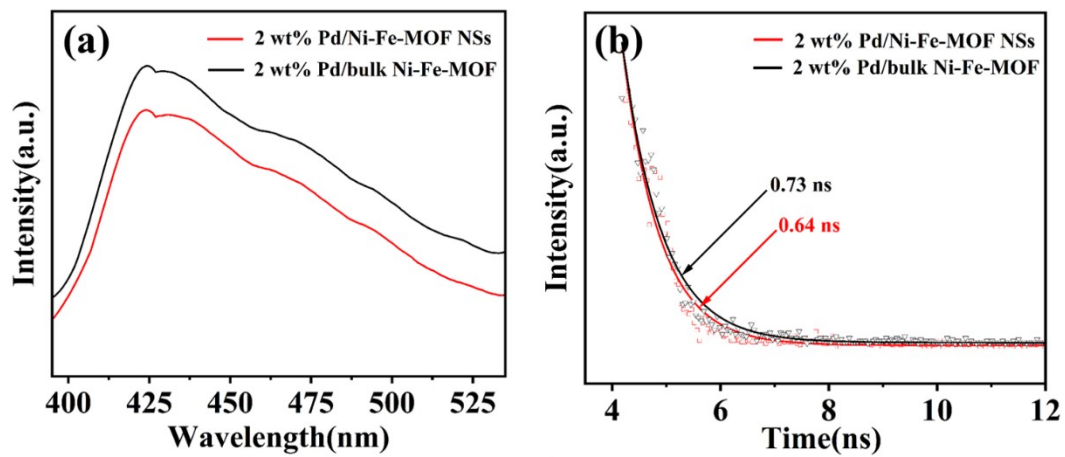

Figure S17. (a) Time-dependent changes in the amounts of aniline over 2 wt% Pd/Ni-Fe-MOF NSs and 2 wt% Pd/bulk Ni-Fe-MOF in reaction systems, (b) TPD spectra of 2 wt% Pd/Ni-Fe-MOF NSs and 2 wt% Pd/bulk Ni-Fe-MOF pre-adsorbed with aniline and benzyl alcohol to saturation.

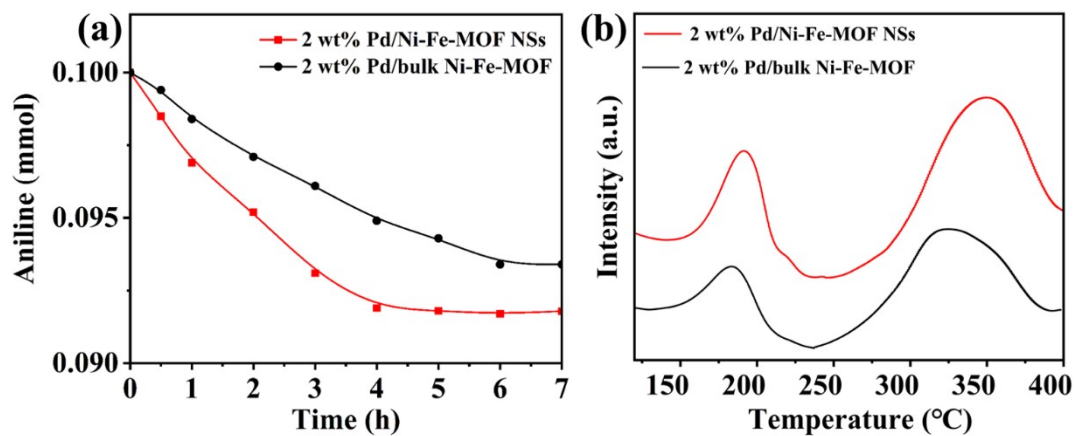

Figure S18. XRD patterns of 2 wt% Pd/Ni-Fe-MOF NSs before and after the reaction.

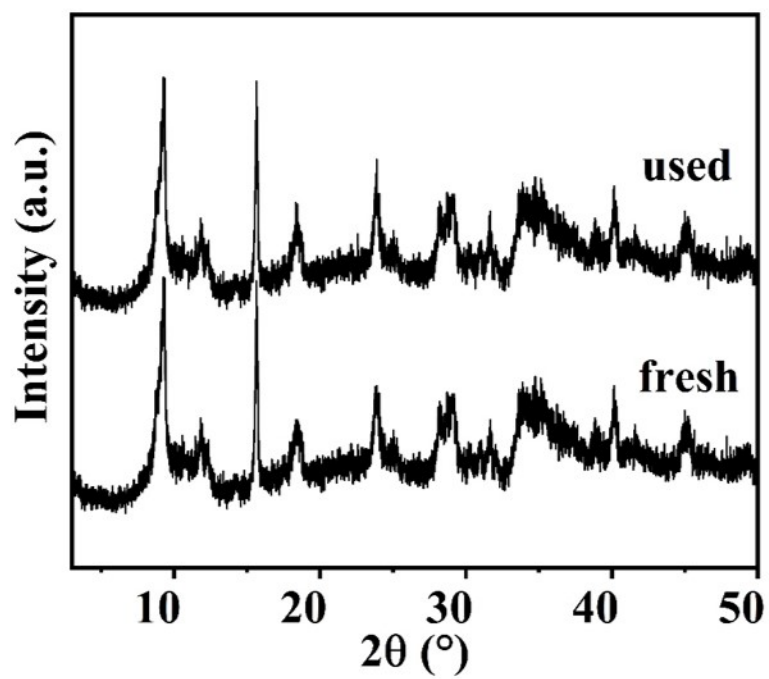

Table S1. Light-induced catalytic performance for N-alkylation of aniline with benzyl

Nc1ccccc1 (1a) + OCCc1ccccc1 (2a)  $\xrightarrow[\text{cat.}]{h\nu, N_2}$  NCCc1ccccc1 (3a) + C=C(Nc1ccccc1)c2ccccc2 (3b) + O=Cc1ccccc1

| Entry | Catalyst              | Conv. [%] <sup>a)</sup> | Yield [%] |    | Aldehyde [ $\mu\text{mol}$ ] |
|-------|-----------------------|-------------------------|-----------|----|------------------------------|
|       |                       |                         | 3a        | 3b |                              |
| 1     | 1wt%Pt/Ni-Fe-MOF NSs  | 29                      | 8         | 14 | 14                           |
| 2     | 2wt%Pt/Ni-Fe-MOF NSs  | 64                      | 26        | 31 | 59                           |
| 3     | 4wt%Pt/Ni-Fe-MOF NSs  | 35                      | 11        | 21 | 32                           |
| 4     | 1wt%Au/Ni-Fe-MOF NSs  | 14                      | 5         | 6  | 19                           |
| 5     | 2wt% Au/Ni-Fe-MOF NSs | 45                      | 3         | 38 | 61                           |
| 6     | 4wt% Au/Ni-Fe-MOF NSs | 29                      | 8         | 14 | 14                           |
| 7     | 1wt% Ag/Ni-Fe-MOF NSs | 17                      | 3         | 8  | 12                           |
| 8     | 2wt%Ag/Ni-Fe-MOF NSs  | 32                      | 9         | 19 | 30                           |
| 9     | 4wt%Ag/Ni-Fe-MOF NSs  | 34                      | 9         | 20 | 30                           |

Reaction conditions: aniline (0.1 mmol), benzyl alcohol (2 mL), catalyst (10 mg),

$N_2$ , 3 W blue LED visible light 12h. <sup>a)</sup> Conv. was calculated based on **1a**.

alcohol under different conditions.
